# Supplementary material for: Courtship Pheromone Use in a Model Urodele, the Mexican Axolotl (Ambystoma mexicanum)
Source: PubMed Central journal article supplement (PMC4740750; doi:10.1038/srep20184), 2016-02-04
Supplement: srep20184-s1.pdf [file srep20184-s1.pdf]

1 **Courtship Pheromone Use in a Model Urodele,**  
2 **the Mexican Axolotl (*Ambystoma mexicanum*)**

3  
4  
5 Margo Maex<sup>1</sup>, Ines Van Bocxlaer<sup>1</sup>, Anneleen Mortier<sup>2</sup>, Paul Proost<sup>2</sup> & Franky  
6 Bossuyt<sup>1</sup>

7  
8  
9  
10 <sup>1</sup> Amphibian Evolution Lab, Biology Department, Vrije Universiteit Brussel (VUB),  
11 Pleinlaan 2, B-1050 Brussels, Belgium

12  
13 <sup>2</sup> Laboratory of Molecular Immunology, Department of Microbiology and Immunology,  
14 KU Leuven - University of Leuven, Minderbroedersstraat 10 - box 1030, B-3000 Leuven,  
15 Belgium

16  
17 **Contains:**

18 **Supplementary note:** Glycoprotein identification.

19 **Table S1:** SPF glycoforms identified by mass spectrometry in courtship and male  
20 water.

21 **Table S2:** Accession numbers of SPF precursor sequences of species used in the  
22 phylogenetic analysis.

23 **Supplementary Figure S3:** Chromatographic separation of proteins present in  
24 courtship, male and female water using a 15RPC column.

25 **Supplementary note: Glycoprotein identification.**

26 To obtain the average relative molecular mass (Mr) of the secreted 20-25 kDa SPF  
27 proteins, molecules were separated by nano reversed-phase liquid chromatography  
28 and masses were determined by on-line mass spectrometry. Deconvolution of the  
29 obtained mass spectra revealed proteins that differ by the mass of one hexose residue  
30 (162-164 Da) from one another. A recent study identified similar series of glycoforms  
31 in the courtship pheromone blend of palmate newts<sup>1</sup>. Here SPFs were shown to be  
32 glycosylated, each carrying a single N-linked glycan moiety that consists of up to nine  
33 hexose residues attached to two core N-acetylhexosamines (HexNAc)<sub>2</sub>. The masses  
34 found in axolotl courtship water point to a similar glycosylation pattern with each  
35 glycoprotein set comprising up to four glycoforms (Supplementary Table S1).

36 In order to compare the measured protein masses to the theoretical relative  
37 molecular mass (Mr) of *in silico* translated SPF transcripts, transcriptome data was  
38 generated by performing RNA sequencing and RACE-PCR on cloacal tissue of a  
39 male that was in breeding condition. Thirteen different SPF cDNA precursor  
40 sequences were identified by RACE-PCR sequencing and every translated SPF  
41 protein sequence showed at least one potential N-linked glycosylation site (Asn-X-  
42 Ser/Thr) (underlined in Fig. 2). A glycosylation pattern similar to the one found in  
43 palmate newt SPF proteins was taken into account for the theoretical Mr computation  
44 of the mature SPF proteins (Supplementary Table S1)<sup>1</sup>. Since for some SPF  
45 precursors multiple N-linked glycosylation sites were predicted, additional  
46 calculations were made with two or three N-linked glycan trees.

47 Three series of glycoforms were identified in courtship water that match the  
48 theoretically predicted Mr of three glycosylated SPF isoforms (Supplementary Table  
49 S1: SPF3, SPF6 and SPF12/13). All three isoforms bear two HexNAcs and five to

50 eight hexoses. A fourth set of corresponding glycoform masses could be assigned to  
51 one of three above-mentioned proteins as well, but deviates from the theoretically  
52 predicted Mr, possibly because of C-terminal cleavage due to carboxy- or  
53 endopeptidases in the samples or the existence of similar precursors with an earlier  
54 stop codon (Supplementary Table S1: SPF12/13-LLNTLSQ). The order in which the  
55 masses and thus their matching SPF cDNA precursors appear in the consecutive RP-  
56 HPLC fractions coincides with the order in which the corresponding Edman  
57 degradation sequences appear (Table 1 and Supplementary Table S1: Fraction I:  
58 SPF12/13, Fraction II: SPF 12/13 and SPF3, Fraction III: SPF12/13, SPF3 and SPF6,  
59 Fraction IV: SPF12/13, low mass spectrometry signal for SPF3 and SPF6, but no  
60 clear detectable N-terminal sequences anymore). No other masses were deduced from  
61 courtship water that could be linked to an SPF precursor for which the N-terminal  
62 sequence corresponds to one of the remaining Edman degradation sequences (SPF9,  
63 SPF2/5/6/7, SPF4, SPF10/11). Remarkably, all of these precursors show more than  
64 one N-glycosylation site, indicating that the isoforms potentially bear more than one  
65 N-linked glycan (Fig. 2). An increased variation in glycosylation could hinder mass  
66 spectrometry as the existence of many more glycoforms per isoform lowers the  
67 individual glycoform concentration and thus ion signal intensity. From fraction V  
68 onwards, the mass spectrometry signal became too weak to assign any mass  
69 unambiguously, although the silver-stained protein gel still shows a 20-25 kDa band  
70 (Fig. 1a, fraction V). This band is significantly less sharp than the bands in fraction I,  
71 II and III, which again suggests the existence of additional glycoforms (and thus the  
72 presence of more than one N-glycan). No 20-25 kDa masses were measured in female  
73 water, while one glycoform set was found in male water (see Supplementary Table  
74 S1). The single Edman degradation sequence in male water suggests that these masses

75 belong to SPF12/13 (Table 1). When taking the possibility of C-terminal degradation  
76 into account, all experimentally obtained masses could effectively be linked to a  
77 shorter or cleaved form of SPF12/13 (see Supplementary Table S1).

78

79 **Supplementary Table S1. SPF glycoforms identified by mass spectrometry in**  
80 **courtship and male water.** Mass spectrometry data of SPF proteins in courtship  
81 water with corresponding cDNA precursors and their theoretically predicted relative  
82 molecular mass, taking signal peptide removal, S-S bridge formation and  
83 glycosylation into account. TFA adducts ( $M_r + 114$  or  $228$ ) were identified for nearly  
84 all glycoforms and are not shown. One glycoform series deviates from the  
85 theoretically predicted  $M_r$ , possibly because of C-terminal degradation due to  
86 carboxy- or endopeptidase activity or the existence of similar precursors with an  
87 earlier stop codon.

88

| Fraction | Mr measured in courtship water                                                                                                                                                               | Mr measured in male water                                    | Protein isoform – Cleaved fragment                        | Calculated Mr of unglycosylated precursor                | HexNAc (Average mass = 203.19) | Hexose (Average mass = 162.14)                                        | Calculated Mr glycosylated precursor                                                                                                                                                                                 |
|----------|----------------------------------------------------------------------------------------------------------------------------------------------------------------------------------------------|--------------------------------------------------------------|-----------------------------------------------------------|----------------------------------------------------------|--------------------------------|-----------------------------------------------------------------------|----------------------------------------------------------------------------------------------------------------------------------------------------------------------------------------------------------------------|
| I        | 21,801.9<br>21,964.0<br>22,127.2                                                                                                                                                             |                                                              | SPF12/13                                                  | 20,584.2                                                 | 2                              | 5<br>6<br>7                                                           | 21,801.3<br>21,963.5<br>22,125.6                                                                                                                                                                                     |
| II       | 21,801.2<br>21,963.4<br>22,128.4<br><br>20,760.6<br>20,923.3<br>21,085.1<br>21,247.1                                                                                                         | 20,708.2<br>20,870.1<br>21,032.3<br>21,194.6<br>21,520.0     | SPF12/13<br><br>SPF12/13-LLNLTLSQ<br><br>SPF3             | 20,584.2<br><br>19814.3<br><br>19,544.0                  | 2<br><br>2<br><br>2            | 5<br>6<br>7<br><br>3<br>4<br>5<br>6<br>8<br><br>5<br>6<br>7<br>8      | 21,801.3<br>21,963.5<br>22,125.6<br><br>20707.1<br>20869.3<br>21031.4<br>21193.6<br>21517.8<br><br>20,761.1<br>20,923.2<br>21,085.4<br>21,247.5                                                                      |
| III      | 21,801.9<br>21,964.1<br>22,125.6<br><br>21,032.6<br>21,192.4<br>21,354.2<br>21,516.9<br><br>20,761.1<br>20,923.6<br>21,086.2<br>21,247.3<br><br>21,013.6<br>21,175.6<br>21,337.8<br>21,499.7 | 20,707.7<br>20,870.0<br>21,032.5<br>21,194.9<br><br>21,520.4 | SPF12/13<br><br>SPF12/13-LLNLTLSQ<br><br>SPF3<br><br>SPF6 | 20,584.2<br><br>19814.3<br><br>19,544.0<br><br>19,796.1  | 2<br><br>2<br><br>2<br><br>2   | 5<br>6<br>7<br><br>3<br>4<br>5<br>6<br>7<br>8<br><br>5<br>6<br>7<br>8 | 21,801.3<br>21,963.5<br>22,125.6<br><br>20,707.1<br>20,869.3<br>21,031.4<br>21,193.6<br>21,355.7<br>21,517.8<br><br>20,761.1<br>20,923.2<br>21,085.4<br>21,247.5<br><br>21,013.2<br>21,175.3<br>21,337.4<br>21,499.6 |
| IV       | 21,802.0<br>21,964.2<br><br><br><i>(only in fraction 54)</i><br><br><i>(only in fraction 54)</i>                                                                                             | 20,708.9<br>20,869.7<br>21,032.6<br>21,194.6<br>21,520.7     | SPF12/13<br><br>SPF12/13-LLNLTLSQ<br><br>SPF3<br><br>SPF6 | 20,584.2<br><br>19,814.3<br><br>19,544.0<br><br>19,796.1 | 2<br><br>2<br><br>2<br><br>2   | 5<br>6<br><br><br>3<br>4<br>5<br>6<br>8<br><br>6<br>7<br>8            | 21,801.3<br>21,963.5<br><br><br>20,707.1<br>20,869.3<br>21,031.4<br>21,193.6<br>21,517.8<br><br>20,923.2<br>21,247.5<br><br>21,175.3<br>21,337.4<br>21,499.6                                                         |
| V        | /                                                                                                                                                                                            | 20707.9<br>20870.1<br>21032.7<br>21195.0                     | SPF12/13-LLNLTLSQ                                         | 19814.3                                                  | 2                              | 3<br>4<br>5<br>6                                                      | 20707.1<br>20869.3<br>21031.4<br>21193.6                                                                                                                                                                             |

89

90

91 **Supplementary Table S2. Accession numbers of SPF precursor sequences of**  
 92 **species used in the phylogenetic analysis.**  
 93

| Species                                                                      | Accession number  | Tissue               | Database |
|------------------------------------------------------------------------------|-------------------|----------------------|----------|
| <i>Ambystoma mexicanum</i> 1, 3, 8, 5,<br>2, 7, 6, 4, 9, 12, 13, 10, 11      | KU043451-KU043463 |                      | NCBI     |
| <i>Ambystoma mexicanum</i> 14<br>( <i>de novo</i> transcript also in cloaca) | CN035733          | larval limb tissue   | NCBI     |
| <i>Ambystoma mexicanum</i> 15<br>( <i>de novo</i> transcript also in cloaca) | CN041146          | larval limb tissue   | NCBI     |
| <i>Ambystoma tigrinum</i>                                                    | CN048649          | brain tissue         | NCBI     |
| <i>Aneides ferreus</i>                                                       | AAZ06335          | male mental gland    | NCBI     |
| <i>Cynops pyrrhogaster</i> 1-2                                               | KU213615-KU213616 | male abdominal gland | NCBI     |
| <i>Cynops pyrrhogaster</i> 4-7                                               | KU213618-KU213621 | male abdominal gland | NCBI     |
| <i>Cynops pyrrhogaster</i> 15                                                | KU213629          | male abdominal gland | NCBI     |
| <i>Cynops pyrrhogaster</i> 25                                                | KU213639          | male abdominal gland | NCBI     |
| <i>Desmognathus ocoee</i>                                                    | AAZ06329          | male mental gland    | NCBI     |
| <i>Eurycea guttolineata</i>                                                  | AAZ06338          | male mental gland    | NCBI     |
| <i>Ichthyosaura alpestris</i> 11                                             | KP849572          | male abdominal gland | NCBI     |
| <i>Ichthyosaura alpestris</i> 14-15                                          | KP849575-KP849576 | male abdominal gland | NCBI     |
| <i>Ichthyosaura alpestris</i> 18                                             | KP849579          | male abdominal gland | NCBI     |
| <i>Ichthyosaura alpestris</i> 22                                             | KP849583          | male abdominal gland | NCBI     |
| <i>Ichthyosaura alpestris</i> 28                                             | KP849589          | male abdominal gland | NCBI     |
| <i>Ichthyosaura alpestris</i> 9                                              | KP849570          | male abdominal gland | NCBI     |
| <i>Lissotriton helveticus</i> 1-5                                            | KJ402326-KJ402330 | male abdominal gland | NCBI     |
| <i>Lissotriton helveticus</i> 12                                             | KJ402337          | male abdominal gland | NCBI     |
| <i>Lissotriton helveticus</i> 8                                              | KJ402333          | male abdominal gland | NCBI     |
| <i>Notophthalmus viridescens</i> 54                                          | KP118912          | male cloacal tissue  | NCBI     |
| <i>Notophthalmus viridescens</i> 57                                          | KP118898          | male cloacal tissue  | NCBI     |
| <i>Notophthalmus viridescens</i> 64                                          | KP118895          | male cloacal tissue  | NCBI     |
| <i>Notophthalmus viridescens</i> 81                                          | KP118927          | male cloacal tissue  | NCBI     |
| <i>Notophthalmus viridescens</i> 96                                          | KM463870          | male cloacal tissue  | NCBI     |
| <i>Notophthalmus viridescens</i> 31                                          | KP118902          | male cloacal tissue  | NCBI     |
| <i>Plethodon stormi</i>                                                      | DQ097067          | male mental gland    | NCBI     |
| <i>Pleurodeles waltl</i> 11                                                  | KM463932          | male cloacal tissue  | NCBI     |
| <i>Pleurodeles waltl</i> 16                                                  | KM463937          | male cloacal tissue  | NCBI     |
| <i>Pleurodeles waltl</i> 2                                                   | KM463923          | male cloacal tissue  | NCBI     |
| <i>Pleurodeles waltl</i> 7                                                   | KM463928          | male cloacal tissue  | NCBI     |
| <i>Silurana tropicalis</i> 13                                                | F6PQG9            | n.a.                 | Uniprot  |
| <i>Silurana tropicalis</i> 22                                                | XP_002943341      | n.a.                 | NCBI     |

94

95

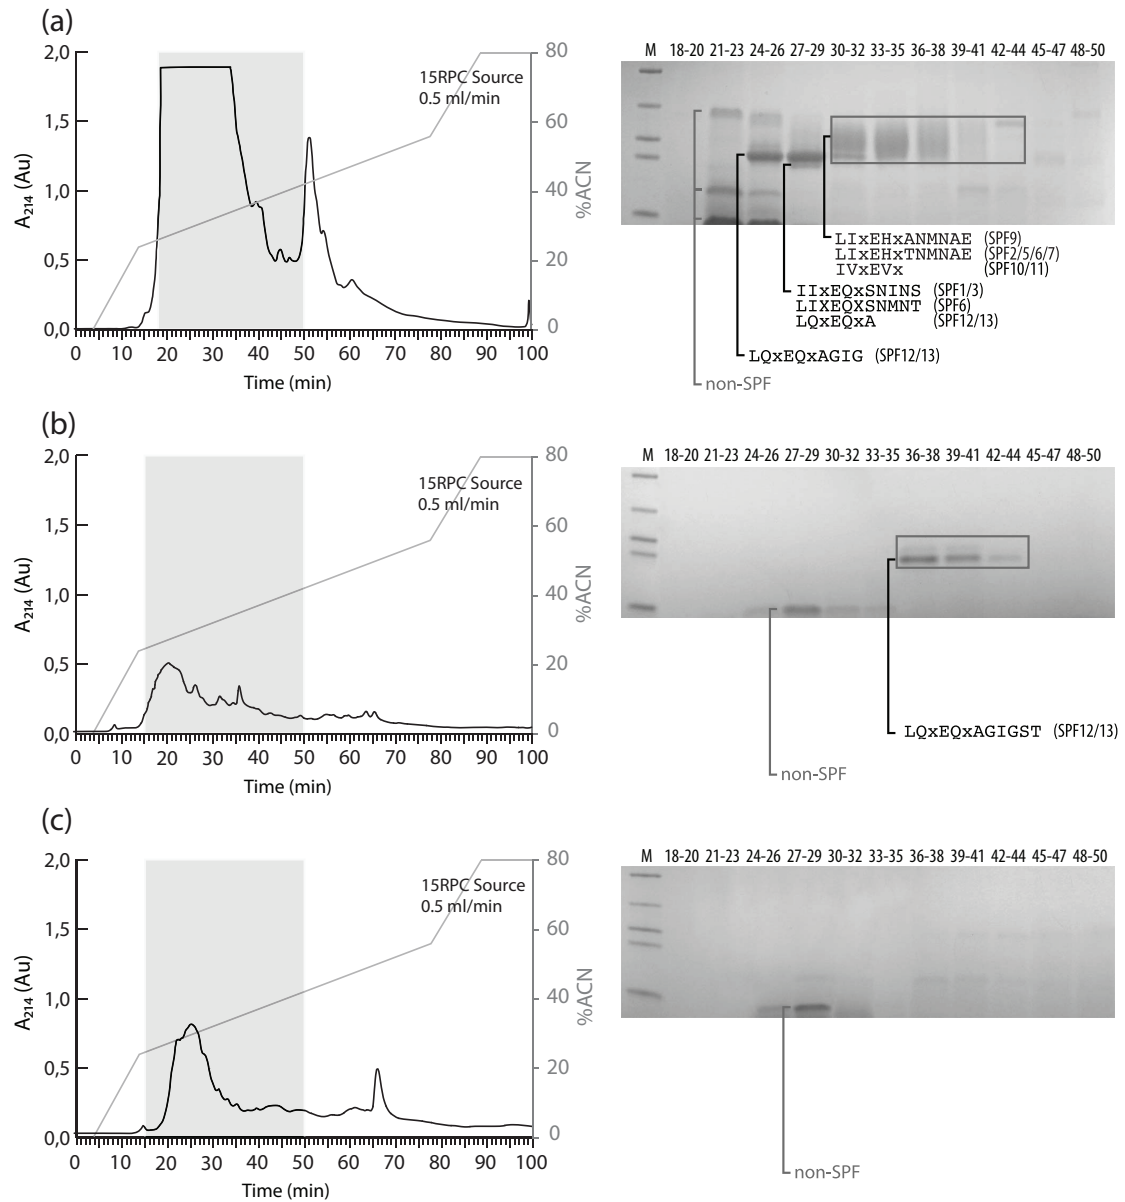

96  
97

98 **Supplementary Figure S3. Chromatographic separation of proteins**

99 **present in courtship, male and female water using a 15RPC column. (a)** Left: RP-  
 100 HPLC elution profile of courtship water. Right: courtship water peak fractions  
 101 ranging from the 18<sup>th</sup> to 50<sup>th</sup> minute of the gradient visualized on a silver-stained  
 102 SDS-PAGE gel (fractions were pooled per three consecutive minutes). Edman  
 103 degradation sequences of the 20-25 kDa protein bands show the SPF elution range on  
 104 a 15RPC column and define the fractions to be screened to identify SPF molecules in  
 105 male and female water. Transcripts obtained by RACE-PCR that correspond to one of

106 the N-terminal sequences are indicated between brackets. **(b)** Left and right: RP-  
107 HPLC elution profile of male water and SDS-PAGE gel of fractions within and  
108 surrounding the SPF elution range. Edman degradation sequencing reveals only a  
109 single SPF sequence in male water. **(c)** Left and right: RP-HPLC elution profile of  
110 female water and SDS-PAGE gel of fractions within and surrounding the SPF elution  
111 range. No SPF sequences were identified by Edman degradation sequencing.

112

### 113 **References**

114 1. Van Bocxlaer, I. et al. Side-by-side secretion of late Palaeozoic diverged courtship  
115 pheromones in an aquatic salamander. *P. Roy. Soc. B-Biol. Sci.* **282**, 20142960 (2015).
